# Supplementary material for: Differential protective effect of zinc and magnesium for the hepatic and renal toxicity induced by acetaminophen and potentiated with ciprofloxacin in rats
Source: Preprints.org preprint supplement (doi:10.20944/preprints202403.0332.v1), 2024-03-06
Supplement: Supplementary file 3 [file supplementary]

*Tabel 1. The values for the assessed biochemical parameters in rats*

| Assessed biochemical parameter / Group | Control | AAPh | AAPh + C | AAPh + C + Mg | AAPh + C + Zn |
| --- | --- | --- | --- | --- | --- |
| ALT  (UI / L) | **69.57 ± 2.57** | **2475.14 ± 284.38**  *P* < 0.001 *vs*. control | **2964.57 ± 343.91**  *P* < 0.001 *vs*. control  0.01 < *P* < 0.05 *vs*. AAPh | **2558.43 ± 251.97**  *P* < 0.001 *vs*. control  NS *vs*. AAPh  0.01 < *P* < 0.05 *vs*. AAPh + C | **2284.14 ± 205.55**  *P* < 0.001 *vs*. control  NS *vs*. AAPh  *P* < 0.001 *vs*. AAPh + C  0.01 < *P* < 0.05 *vs*. AAPh + C + Mg |
| AST  (UI / L) | **154.43 ± 13.20** | **578.86 ± 61.56**  *P* < 0.001 *vs*. control | **650.43 ± 59.33**  *P* < 0.001 *vs*. control  0.01 < *P* < 0.05 *vs*. AAPh | **585.71 ± 28.61**  *P* < 0.001 *vs*. control  NS *vs*. AAPh  0.01 < *P* < 0.05 *vs*. AAPh + C | **583.57 ± 29.31**  *P* < 0.001 *vs*. control  0.01 < *P* < 0.05 *vs*. AAPh  0.01 < *P* < 0.05 *vs*. AAPh + C  NS *vs*. AAPh + C + Mg |
| LDH  (UI / L) | **456.43 ± 117.74** | **3309 ± 287.64**  *P* < 0.001 *vs*. control | **3463.86 ± 228.73**  *P* < 0.001 *vs*. control  NS *vs*. AAPh | **3139.57 ± 302.39**  *P* < 0.001 *vs*. control  NS *vs*. AAPh  0.01 < *P* < 0.05 *vs*. AAPh + C | **2806.14 ± 201.28**  *P* < 0.001 *vs*. control  *P* < 0.001 *vs*. AAPh  *P* < 0.001 *vs*. AAPh + C  0.01 < *P* < 0.05 *vs*. AAPh + C + Mg |
| GGT  (x 100UI / L ) | **33.57 ± 5.97** | **67.14 ± 6.12**  *P* < 0.001 *vs*. control | **69.85 ± 5.73**  *P* < 0.001 *vs*. control  NS *vs*. AAPh | **60.86 ± 7.10**  *P* < 0.001 *vs*. control  NS *vs*. AAPh  0.01 < *P* < 0.05 *vs*. AAPh + C | **59.71 ± 4.79**  *P* < 0.001 *vs*. control  0.01 < *P* < 0.05 *vs*. AAPh  0.001 < *P* < 0.01 *vs*. AAPh + C  NS *vs*. AAPh + C + Mg |
| ALP  (x 100UI / L ) | **105 ± 6.66** | **166.57 ± 19.04**  *P* < 0.001 *vs*. control | **205 ± 15.21**  *P* < 0.001 *vs*. control  0.001 < *P* < 0.01 *vs*. AAPh | **189.57 ± 9.24**  *P* < 0.001 *vs*. control  0.01 < *P* < 0.05 *vs*. AAPh  0.01 < *P* < 0.05 *vs*. AAPh + C | **188.29 ± 12.75**  *P* < 0.001 *vs*. control  0.01 < *P* < 0.05 *vs*. AAPh  0.01 < *P* < 0.05 *vs*. AAPh + C  NS *vs*. AAPh + C + Mg |
| Ureea  (mg / dL) | **31.43 ± 2.82** | **63.14 ± 6.15**  *P* < 0.001 *vs*. control | **71.57 ± 7.00**  0.01 < *P* < 0.05 *vs*. AAPh | **61.57 ± 4.72**  *P* < 0.001 *vs*. control  NS *vs*. AAPh  0.001 < *P* < 0.01 *vs*. AAPh + C | **60.28 ± 4.31**  *P* < 0.001 *vs*. control  0.01 < *P* < 0.05 *vs*. AAPh  0.001 < *P* < 0.01 *vs*. AAPh + C  NS *vs*. AAPh + C + Mg |
| Creatinine  (mg / dL) | **5.91 ± 1.17** | **8.42 ± 0.80**  *P* < 0.001 *vs*. control | **9.33 ± 0.59**  *P* < 0.001 *vs*. control  0.01 < *P* < 0.05 *vs*. AAPh | **7.66 ± 1.11**  0.01 < *P* < 0.05 vs. control  NS *vs*. AAPh  0.001 < *P* < 0.01 *vs*. AAPh + C | **60.28 ± 4.31**  0.01 < *P* < 0.05 vs. control  0.01 < *P* < 0.05 *vs*. AAPh  0.001 < *P* < 0.01 *vs*. AAPh + C  NS *vs*. AAPh + C + Mg |
| SOD (pg / mL) | **24.71 ± 3.45** | **19.29 ± 1.50**  0.001 < *P* < 0.01 *vs*. control | **17.42 ± 1.27**  *P* < 0.001 *vs*. control  0.01 < *P* < 0.05 *vs*. AAPh | **19.57 ± 1.90**  0.001 < *P* < 0.01 vs. control  NS *vs*. AAPh  0.01 < *P* < 0.05 *vs*. AAPh + C | **20.43 ± 2.30**  0.01 < *P* < 0.05 vs. control  0.01 < *P* < 0.05 *vs*. AAPh  0.01 < *P* < 0.05 *vs*. AAPh + C  NS *vs*. AAPh + C + Mg |
| GPX (pg / mL) | **31.57 ± 3.60** | **26 ± 4.08**  0.01 < *P* < 0.05 vs. control | **23,42 ± 3.46**  0.001 < *P* < 0.01 *vs*. control  NS vs. AAPh | **26.43 ± 5.71**  NS *vs*. control  NS vs. AAPh  NS vs. AAPh + C | **27.71 ± 3.77**  NS *vs*. control  NS vs. AAPh  0.01 < *P* < 0.05 *vs*. AAPh + C  NS vs. AAPh + C + Mg |
